# Supplementary material for: Sex chromosome evolution in snakes inferred from divergence patterns of two gametologous genes and chromosome distribution of sex chromosome-linked repetitive sequences
Source: PubMed Central journal article supplement (PMC5002183; doi:10.1186/s40851-016-0056-1), 2016-08-26
Supplement: 40851_2016_56_MOESM9_ESM.pdf [file 40851_2016_56_MOESM9_ESM.pdf]

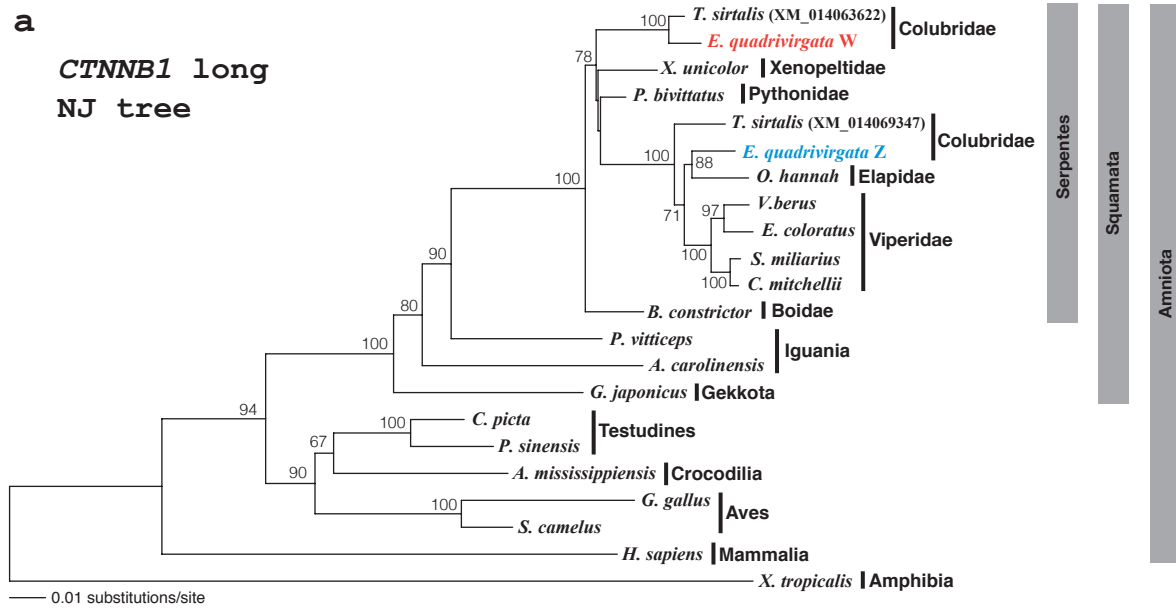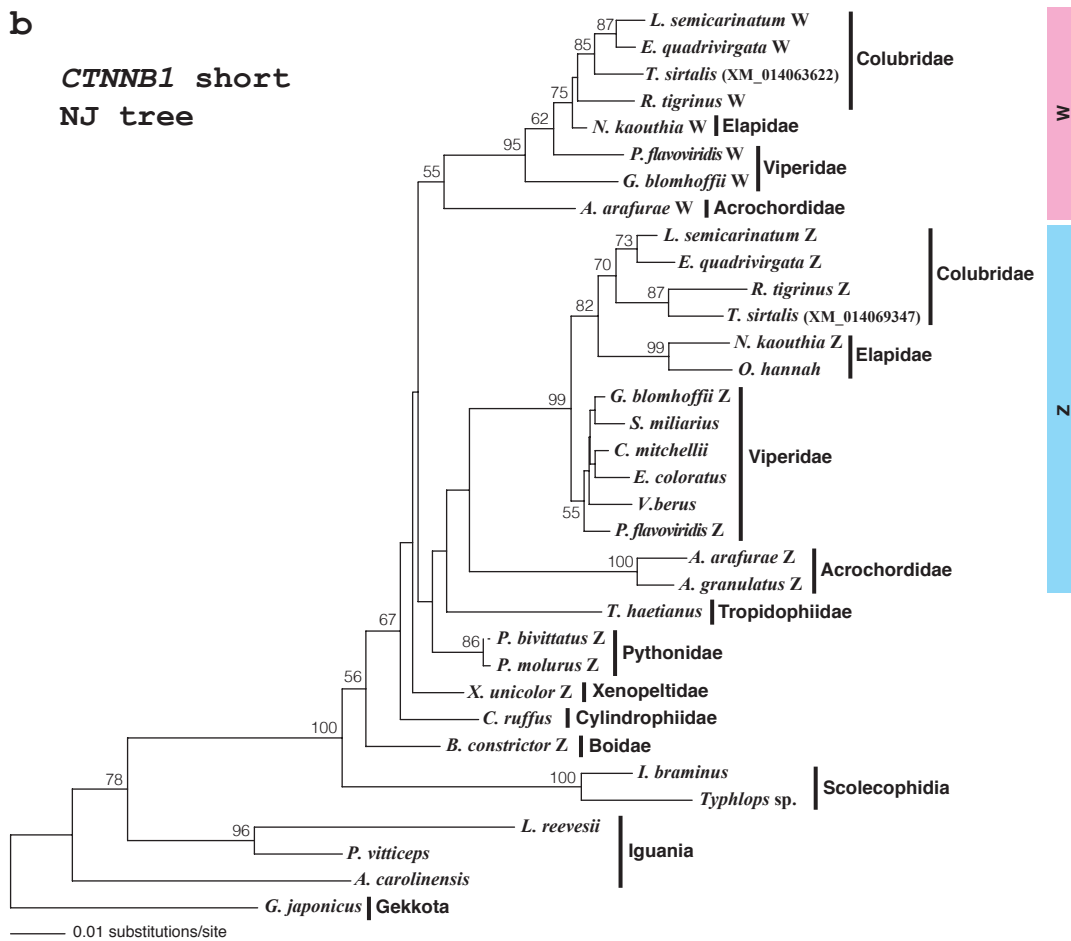

**Additional file 9. Molecular phylogenetic trees of *CTNNB1* gene.** Neighbor-joining (NJ) trees of *CTNNB1* genes were constructed with the long alignment for 20 tetrapod species (**a**) and the short alignment for 26 squamates species (**b**). Bootstrap values (>50%) are shown on each node. Classification is shown on the right side of species. Blue and pink bars in **b** show clades of Z and W homologs of caenophidian species.
