# Supplementary material for: Sex chromosome evolution in snakes inferred from divergence patterns of two gametologous genes and chromosome distribution of sex chromosome-linked repetitive sequences
Source: PubMed Central journal article supplement (PMC5002183; doi:10.1186/s40851-016-0056-1), 2016-08-26
Supplement: 40851_2016_56_MOESM11_ESM.pdf [file 40851_2016_56_MOESM11_ESM.pdf]

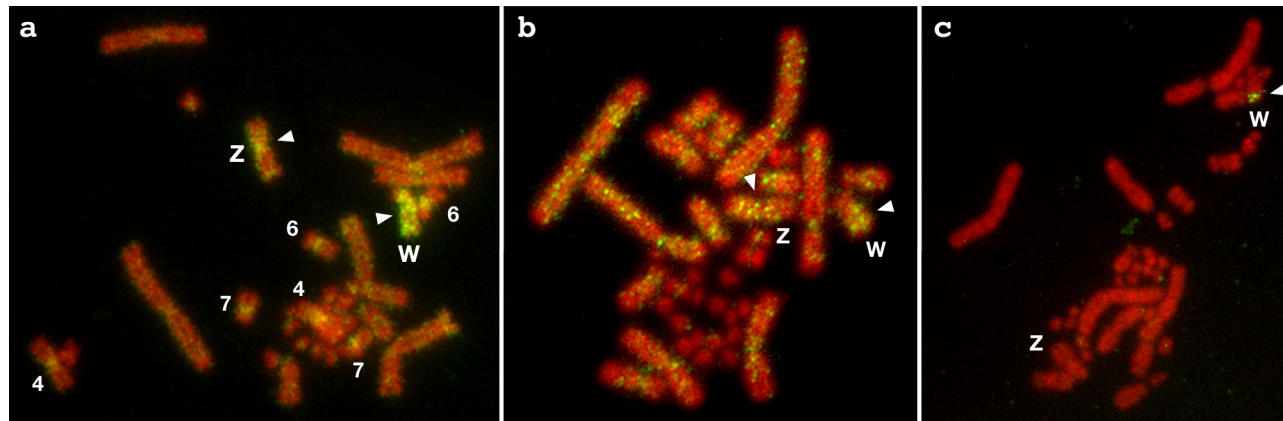

**Additional file 11. FISH of EQU-BglI-15 repetitive sequence and (AGAT)<sub>8</sub> microsatellite motif in *E. quadrivirgata* and *G. blomhoffii*.** FITC-labelled *E. quadrivirgata* BglI-15 repeat was hybridized to PI-stained metaphase spreads of *E. quadrivirgata* (a) and *G. blomhoffii* (b). The (AGAT)<sub>8</sub> microsatellite motif was hybridized to metaphase spreads of *G. blomhoffii* (c). Arrowheads indicate hybridization signals on sex chromosomes.
